# Supplementary material
Source: PubMed Central journal article supplement (PMC10508179)

**HO inciting event**

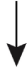

**Inflammation**

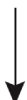

*Activin A  
TGF $\beta$   
Other cytokines*

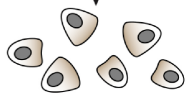

**Progenitor cell recruitment**

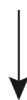

*BMPs  
pSMAD1/5/8*      *Activin A / TGF $\beta$   
pSMAD2/3*

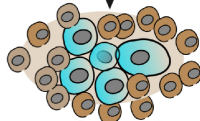

**Chondrogenesis and osteogenesis**

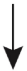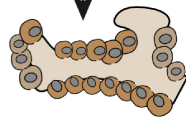

**Endochondral HO**

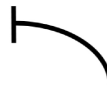

**Immunotherapy**

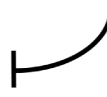

Supplement: NIHMS1928435-supplement-Supp__Fig14.pdf [file NIHMS1928435-supplement-Supp__Fig14.pdf]
