# Supplementary material
Source: PubMed Central journal article supplement (PMC10508179)

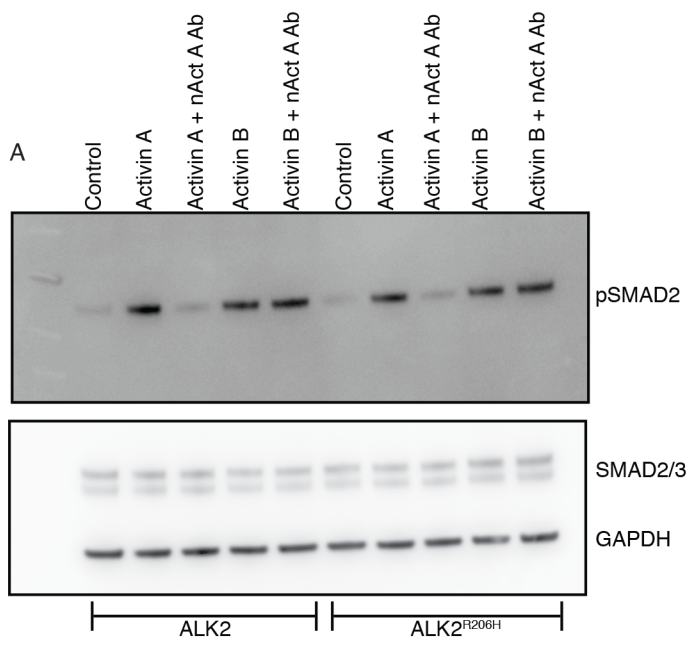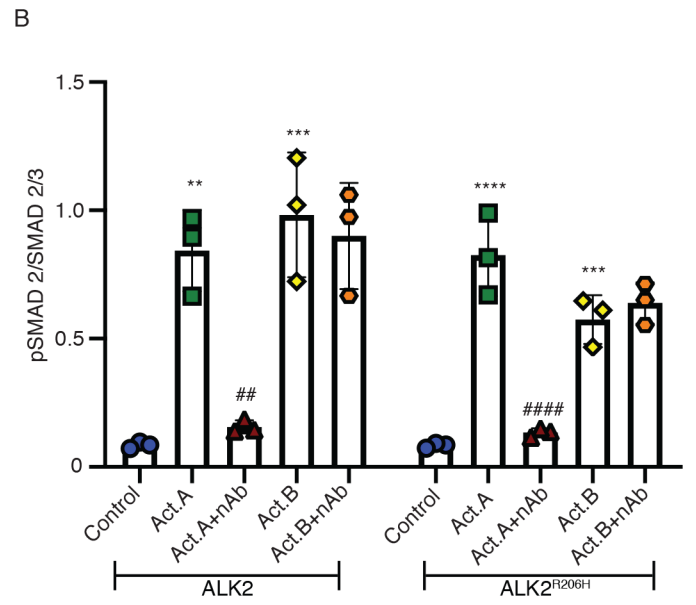

Supplement: NIHMS1928435-supplement-Supp__Fig1.pdf [file NIHMS1928435-supplement-Supp__Fig1.pdf]

BMP6 + IgG

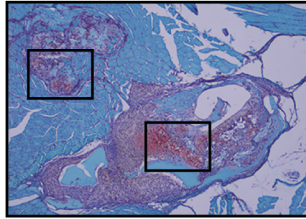

BMP6 + nActA Ab

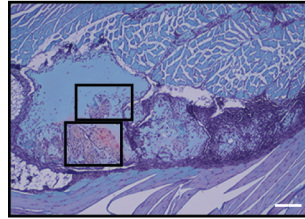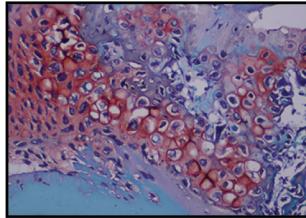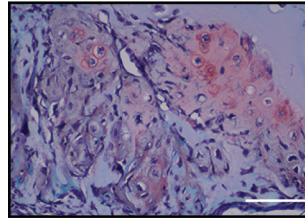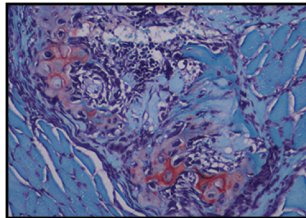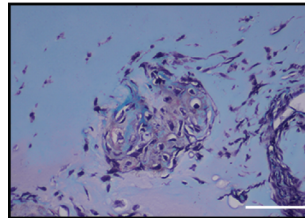

Supplement: NIHMS1928435-supplement-Supp__Fig10.pdf [file NIHMS1928435-supplement-Supp__Fig10.pdf]

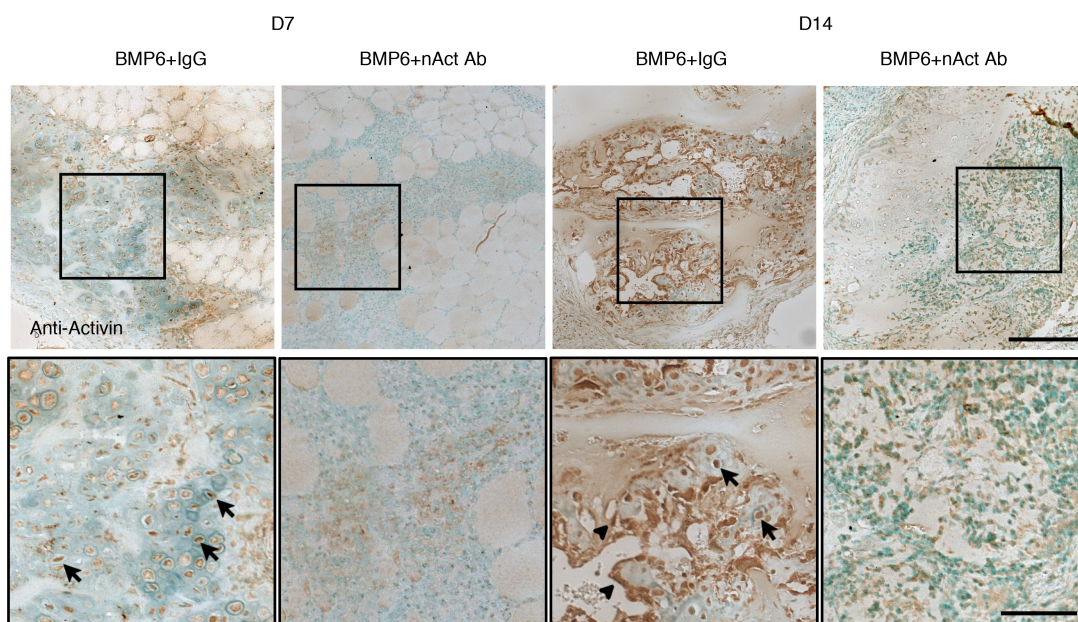

Supplement: NIHMS1928435-supplement-Supp__Fig11.pdf [file NIHMS1928435-supplement-Supp__Fig11.pdf]

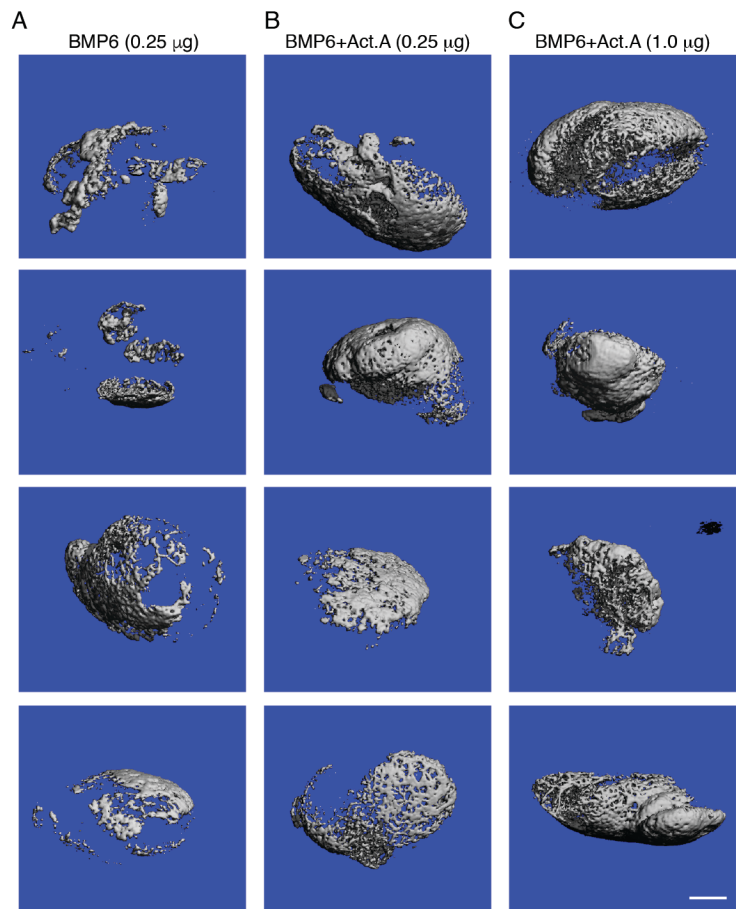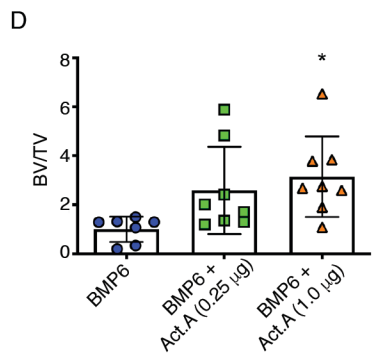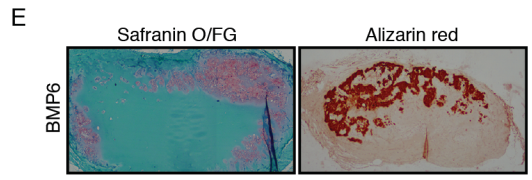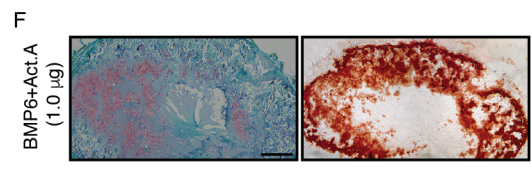

Supplement: NIHMS1928435-supplement-Supp__Fig12.pdf [file NIHMS1928435-supplement-Supp__Fig12.pdf]

**A**

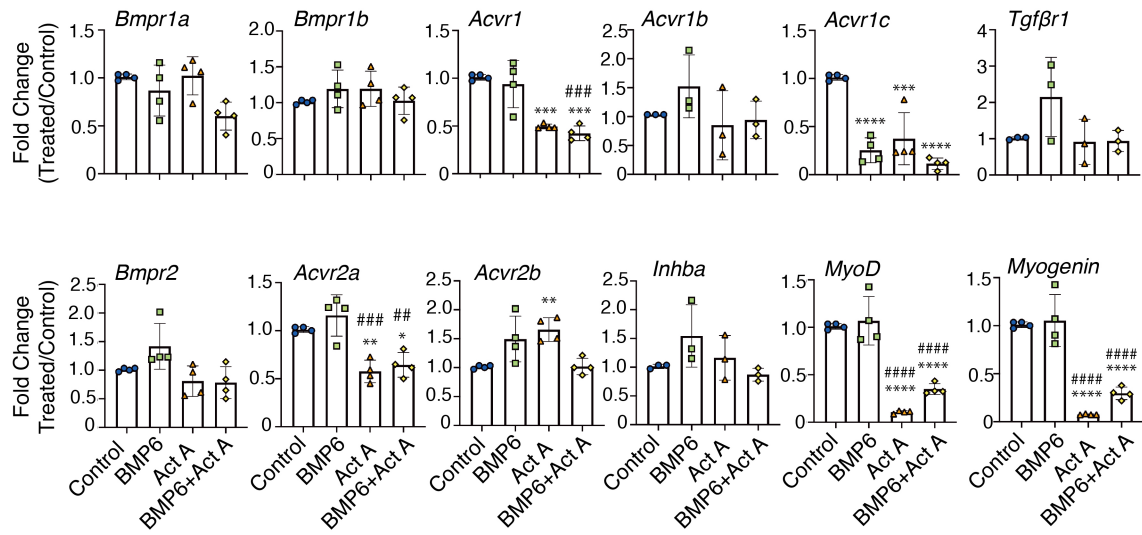

**B**

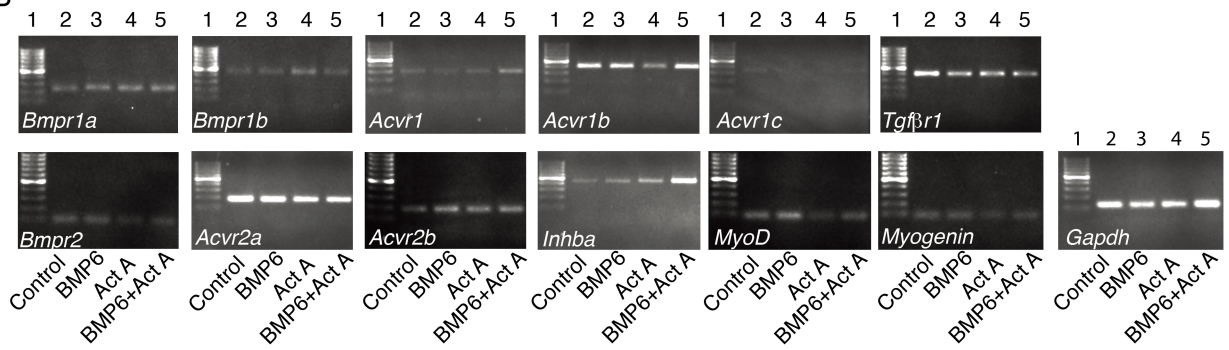

Supplement: NIHMS1928435-supplement-Supp__Fig13.pdf [file NIHMS1928435-supplement-Supp__Fig13.pdf]

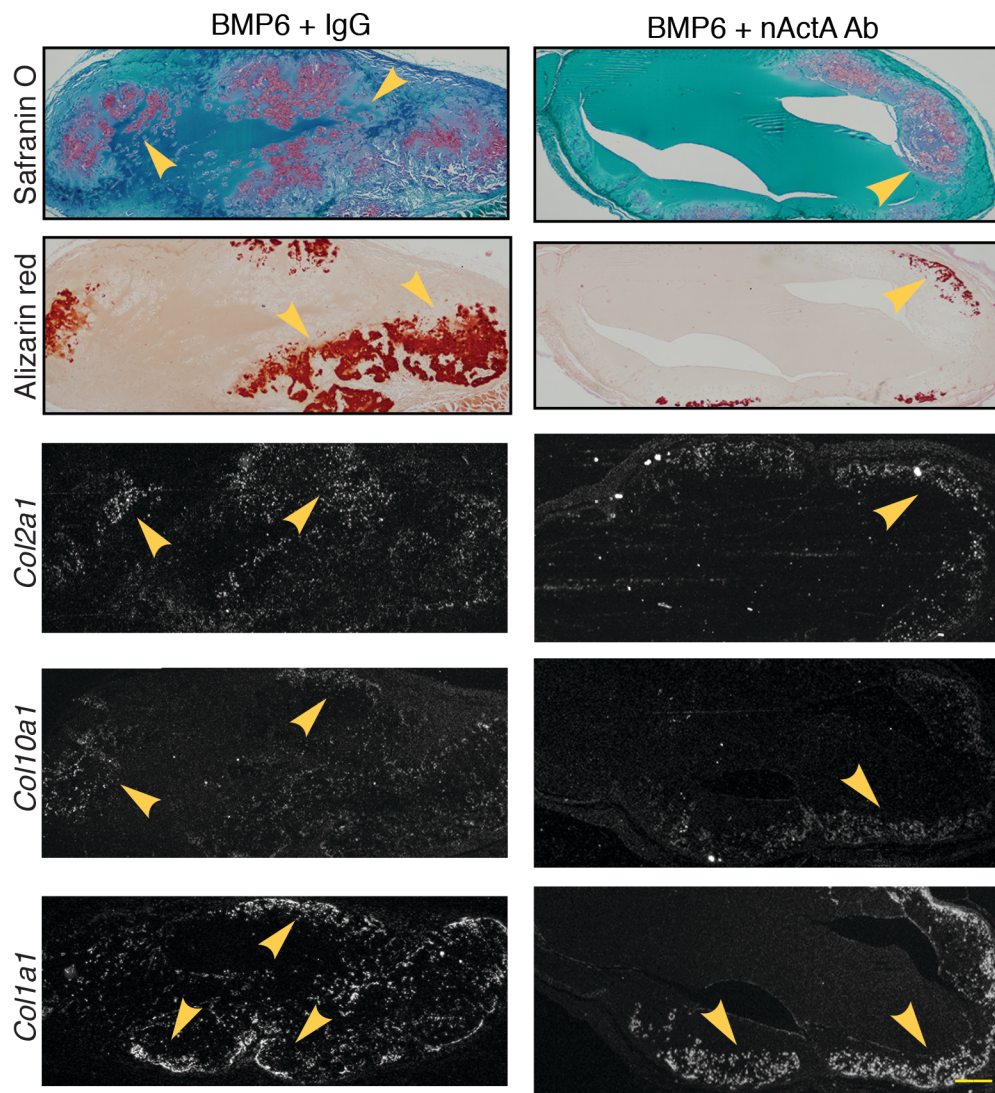

Supplement: NIHMS1928435-supplement-Supp__Fig2.pdf [file NIHMS1928435-supplement-Supp__Fig2.pdf]

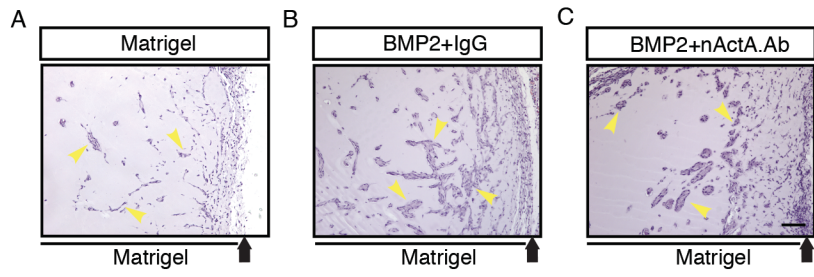

Supplement: NIHMS1928435-supplement-Supp__Fig3.pdf [file NIHMS1928435-supplement-Supp__Fig3.pdf]

A

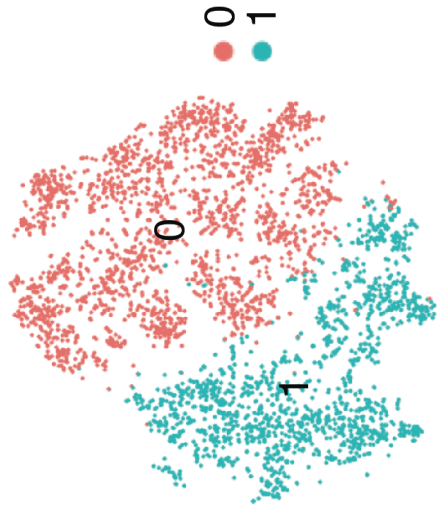

B

*Pdgfra*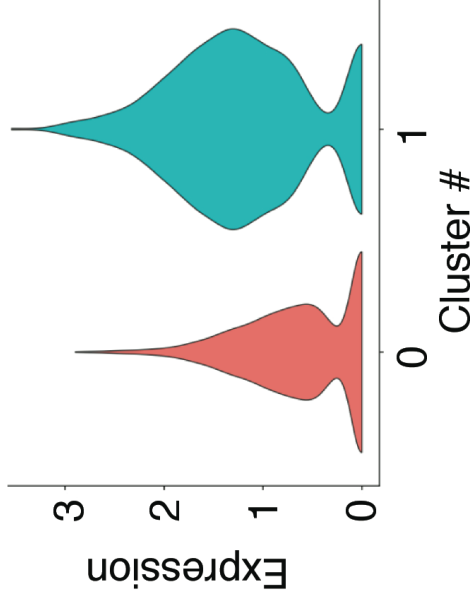

C

*Prrx1*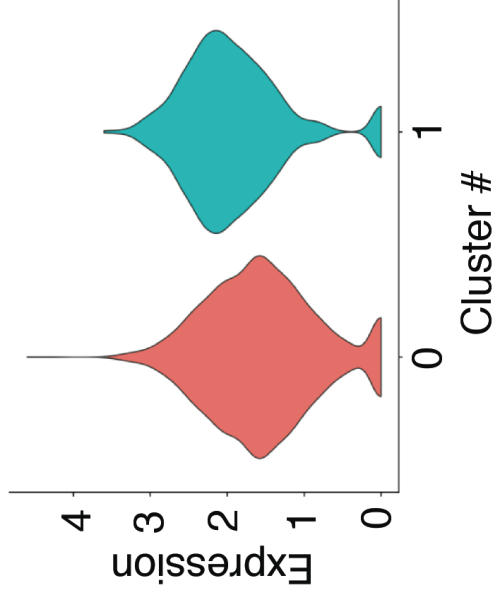

D

### Gene Ontology Terms (Chondrogenic cluster vs. MSC cluster)

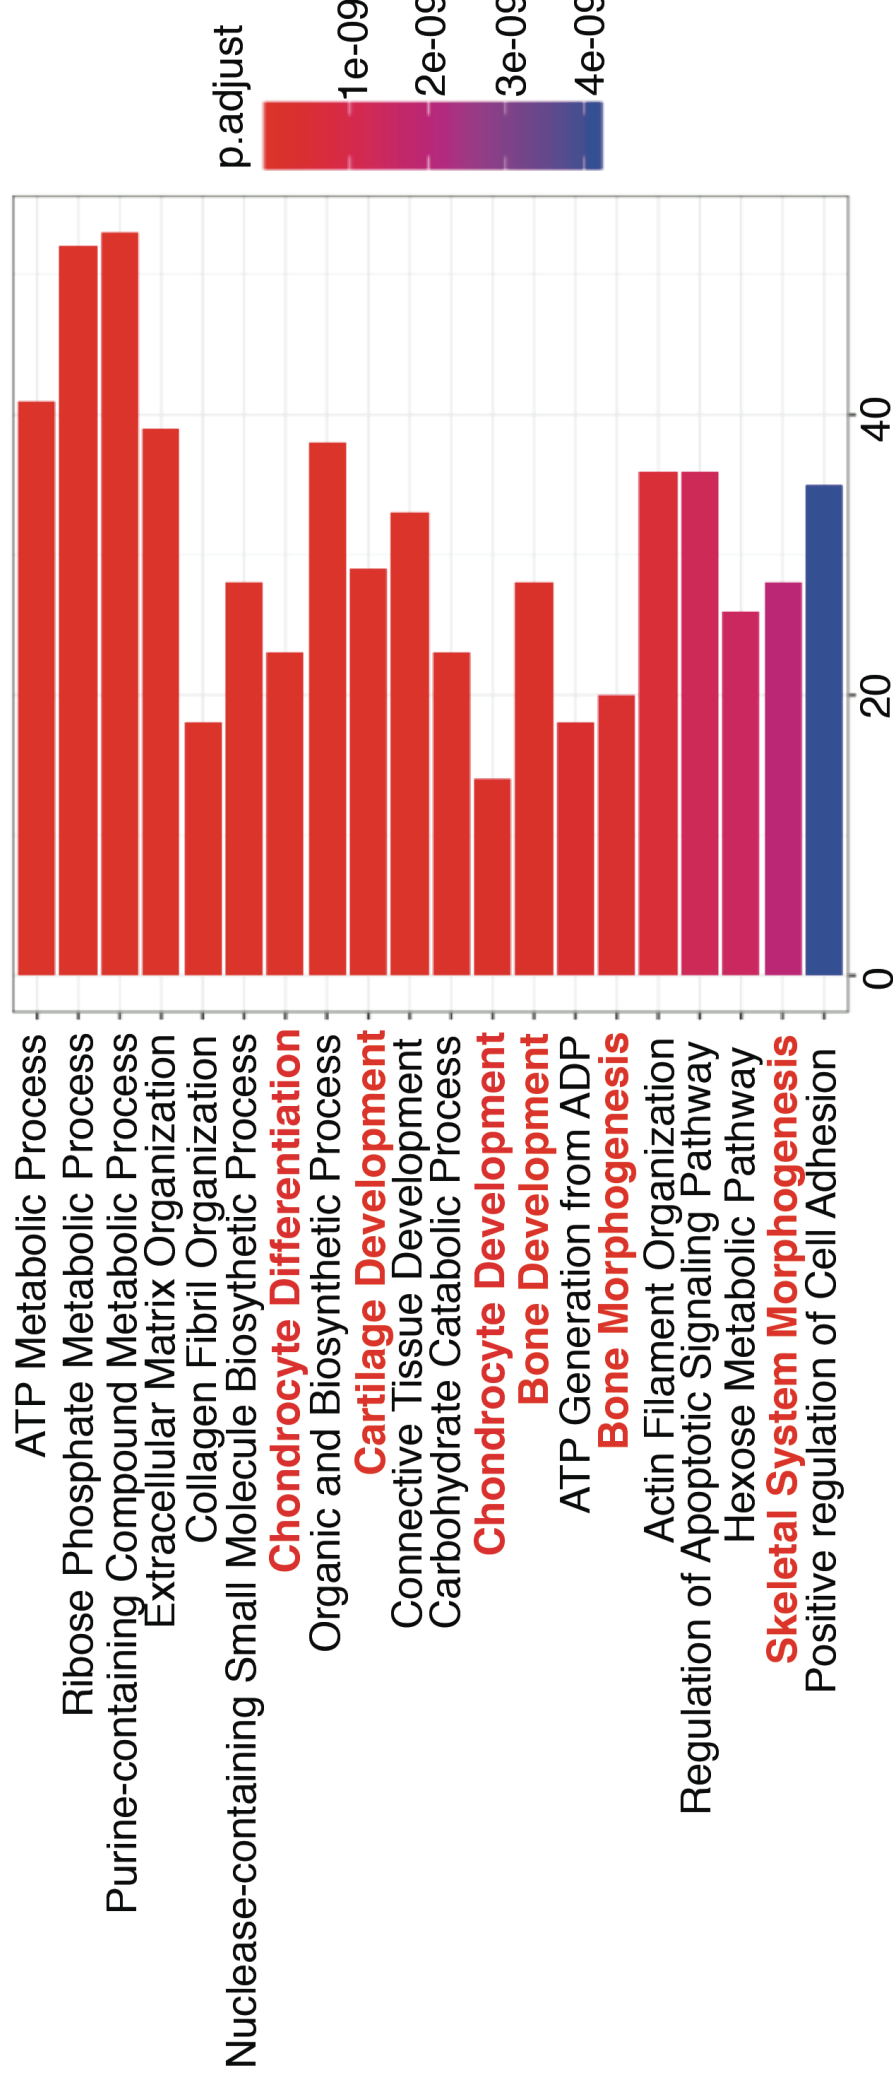

Supplement: NIHMS1928435-supplement-Supp__Fig4.pdf [file NIHMS1928435-supplement-Supp__Fig4.pdf]

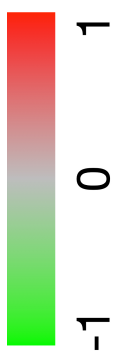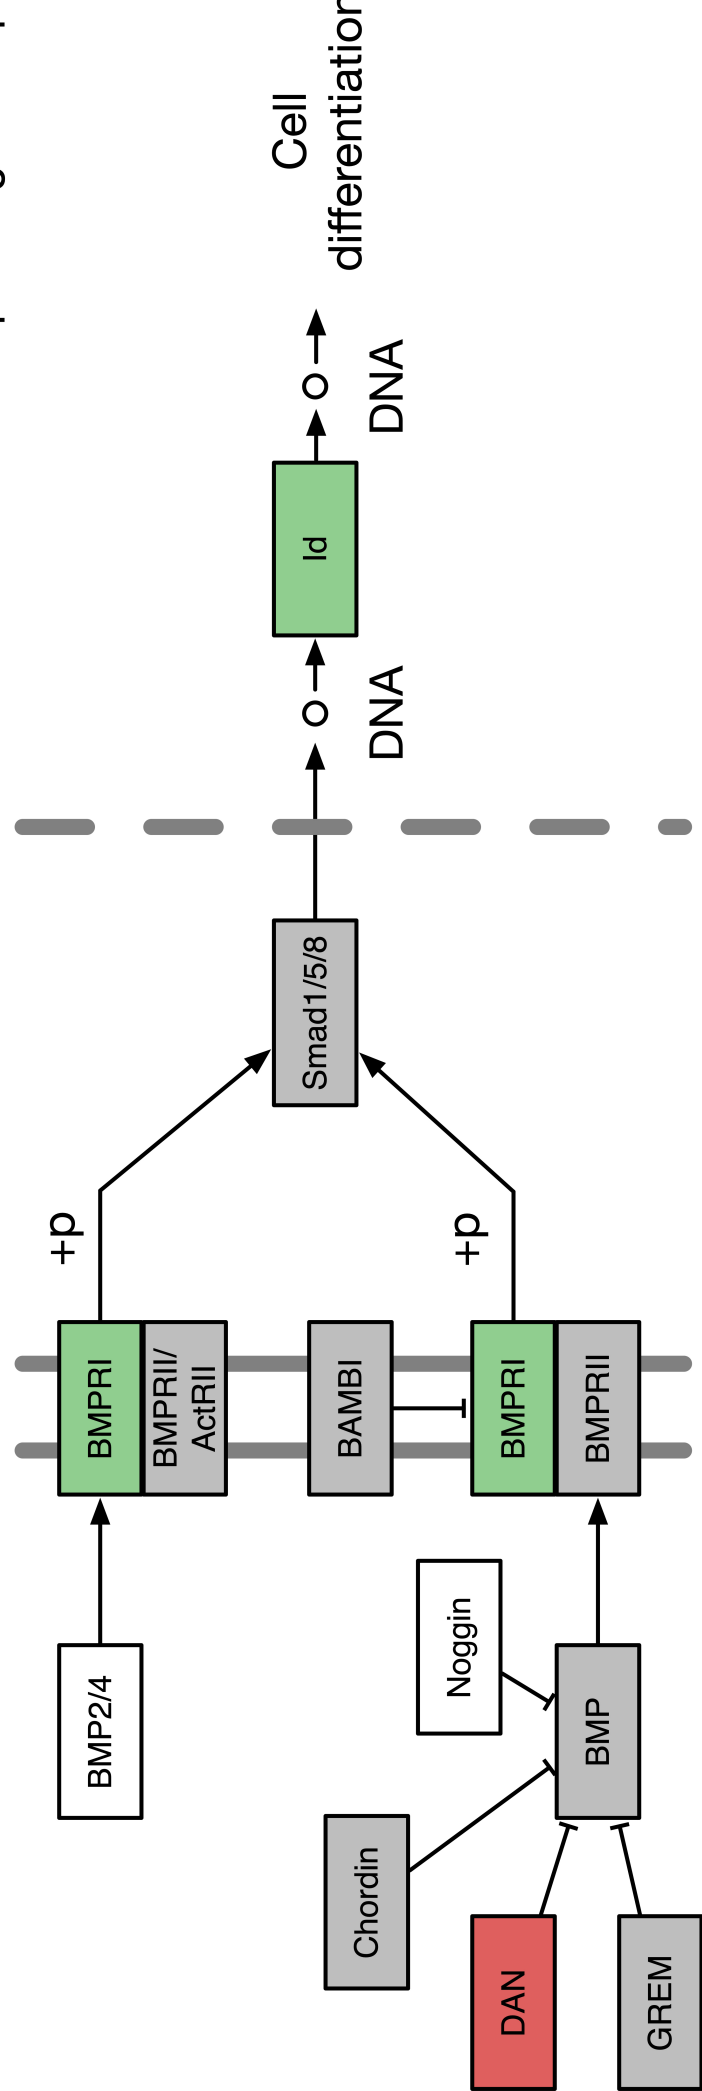

Supplement: NIHMS1928435-supplement-Supp__Fig5.pdf [file NIHMS1928435-supplement-Supp__Fig5.pdf]

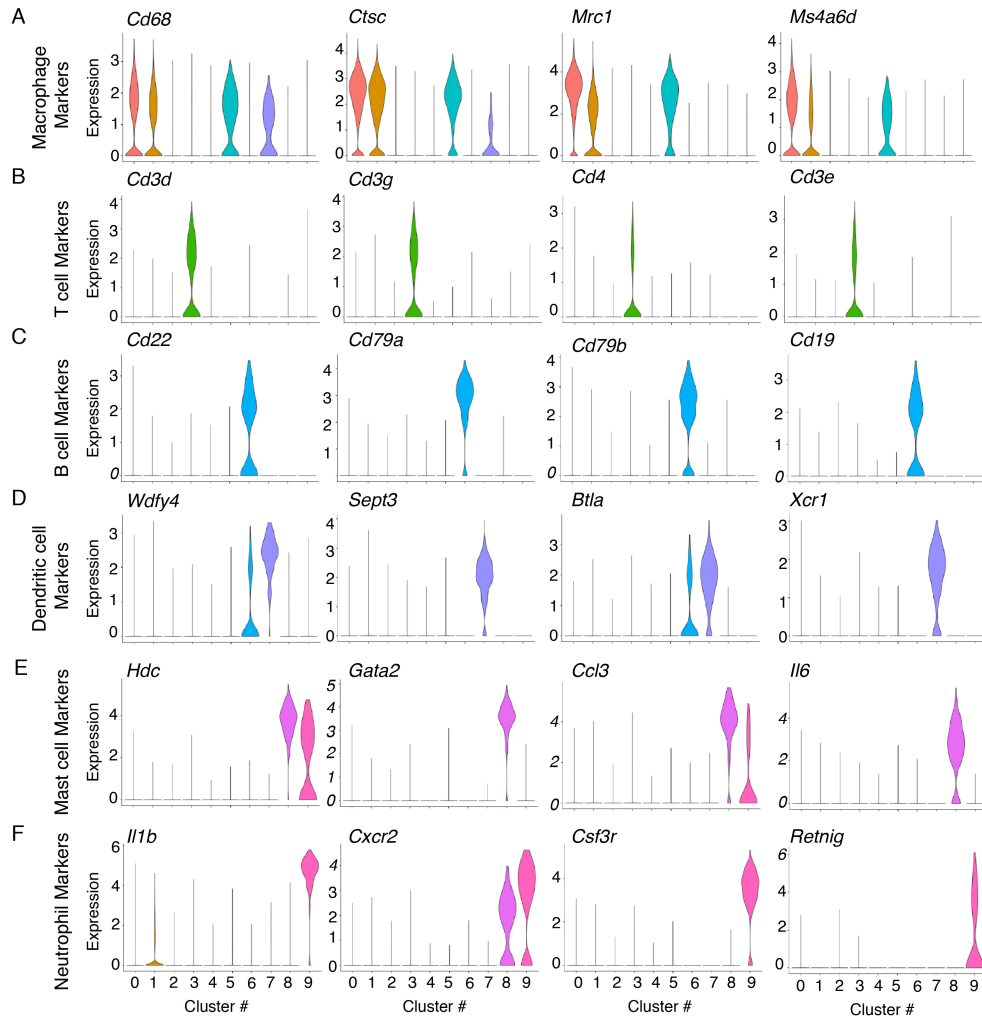

Supplement: NIHMS1928435-supplement-Supp__Fig6.pdf [file NIHMS1928435-supplement-Supp__Fig6.pdf]

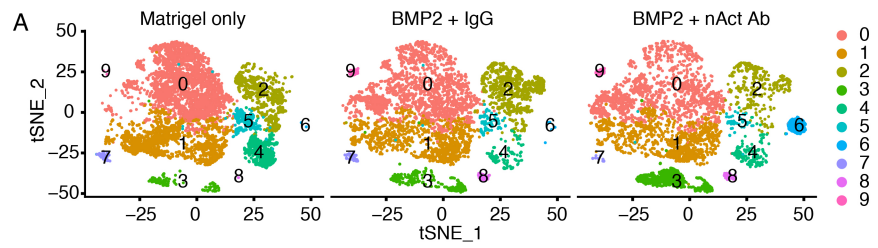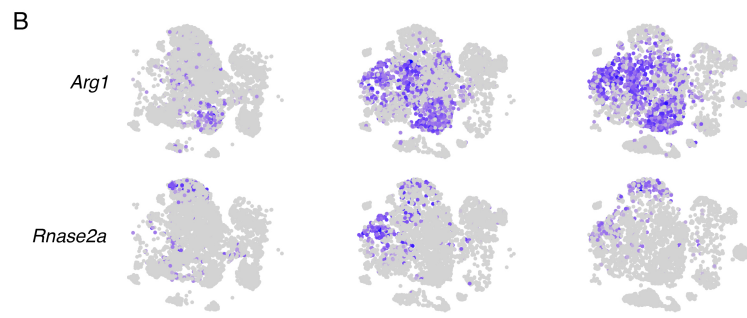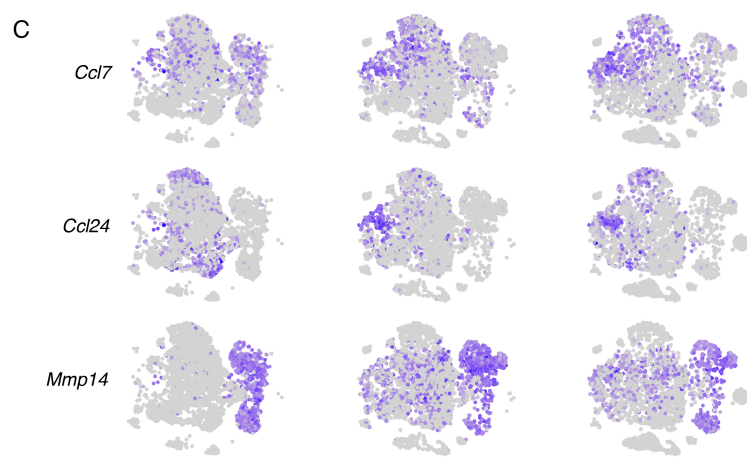

Supplement: NIHMS1928435-supplement-Supp__Fig7.pdf [file NIHMS1928435-supplement-Supp__Fig7.pdf]

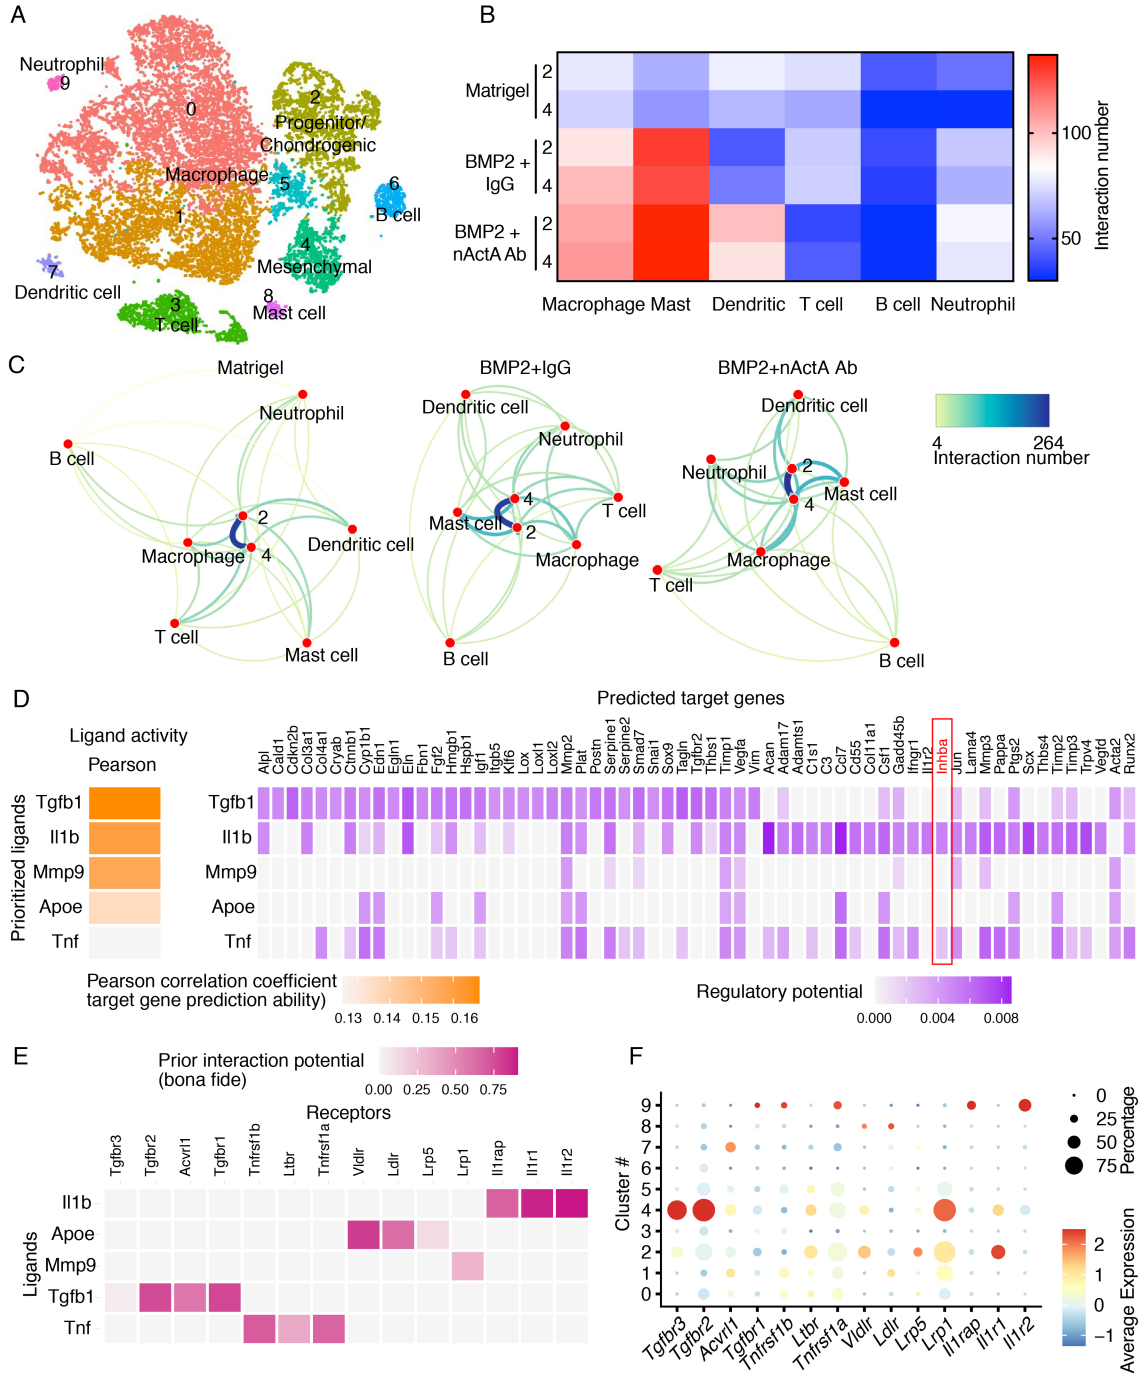

Supplement: NIHMS1928435-supplement-Supp__Fig8.pdf [file NIHMS1928435-supplement-Supp__Fig8.pdf]

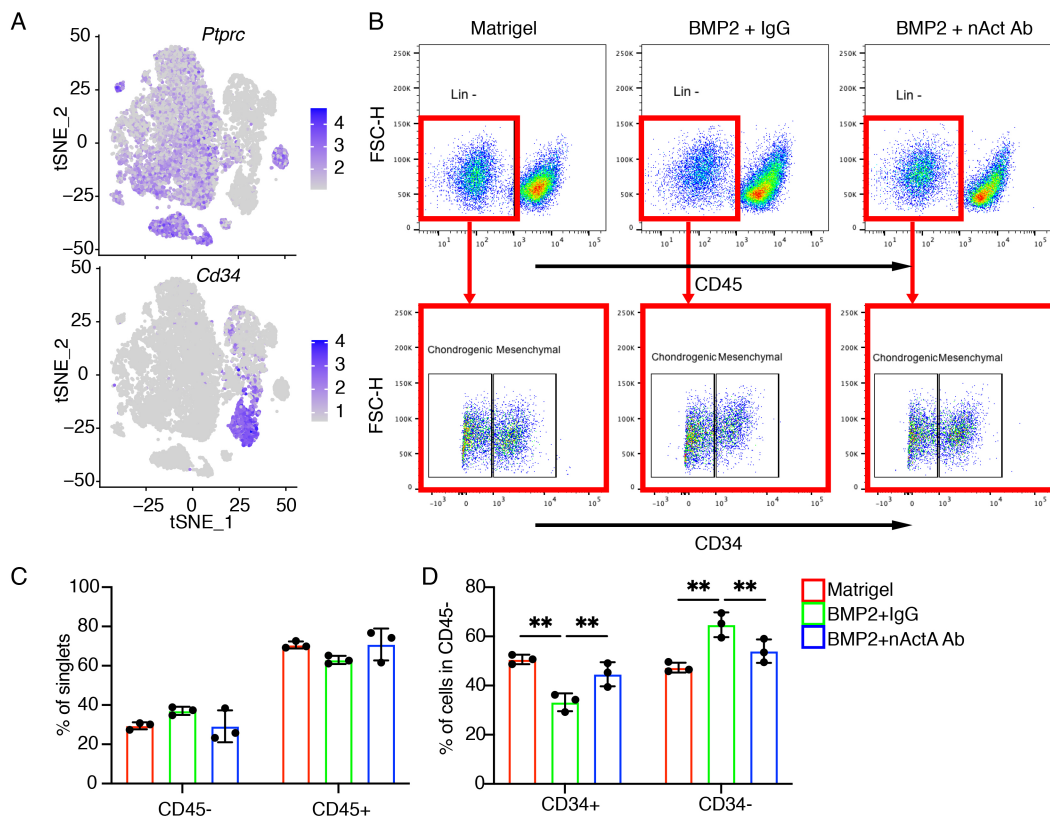

Supplement: NIHMS1928435-supplement-Supp__Fig9.pdf [file NIHMS1928435-supplement-Supp__Fig9.pdf]
